# Supplementary material for: Simultaneous pseudocapacitive oxidation and oxygen evolution reaction: reciprocity or incompatibility?
Source: Royal Society of Chemistry journal article supplement (doi:10.1039/d4qi02666g), 2025-01-01
Supplement: d4qi02666g1.pdf [file d4qi02666g1.pdf]

# Simultaneous pseudocapacitive oxidation and oxygen evolution reaction: reciprocity or incompatibility?

Xinpeng Huang<sup>a</sup>, Yingnan Yan<sup>a</sup>, Xuehua Yan<sup>a,b,\*</sup>, Qianzuo Liu<sup>a</sup>, Feng Zhang<sup>a</sup>, Jili Wu<sup>a</sup>, Jianmei Pan<sup>a</sup>, Zohreh Shahnava<sup>b</sup>, Jamile Mohammadi Moradian<sup>b</sup>

<sup>a</sup>*School of Materials Science and Engineering, Jiangsu University, Zhenjiang 212013, Jiangsu, China*

<sup>b</sup>*Institute for Advanced Materials, Jiangsu University, Zhenjiang 212013, Jiangsu, China*

\*Corresponding author: Xuehua Yan: xhyan@ujs.edu.cn

## EXPERIMENT SECTION

### 1. Reagents and raw materials

All reagents used in this work were analytical reagents. The reagents used include  $\text{NiCl}_2 \cdot 6\text{H}_2\text{O}$ ,  $\text{CoCl}_2 \cdot 6\text{H}_2\text{O}$ ,  $\text{AlCl}_3 \cdot 6\text{H}_2\text{O}$ ,  $\text{FeCl}_3 \cdot 6\text{H}_2\text{O}$ ,  $\text{CuCl}_2 \cdot 2\text{H}_2\text{O}$ ,  $\text{CH}_4\text{N}_2\text{O}$ ,  $\text{KOH}$ ,  $\text{H}_2\text{SO}_4$ ,  $\text{HNO}_3$  that were purchased from Sinopharm Chemical Reagent Co., Ltd, China. Carbon cloth (CC) was purchased from CeTech Co., Ltd. And the deionized water was obtained by SCSJ-II-20L in our lab. All reagents were directly used as received.

### 2. Samples preparation

The substrate used for the self-grown samples was 1 cm×1 cm carbon cloth, which was activated before use as follows: the carbon cloth was immersed in 10 wt.% nitric acid and 10 wt.% sulfuric acid in a volume ratio of 3:1 for 6 h, followed by sonication in water and anhydrous ethanol alternately for 10 min each to wash off the nitric acid and sulfuric acid, and vacuum dried for use. The effectively exposed area of each electrode is 1 cm<sup>2</sup> (2×1 cm×0.5 cm) in the electrochemical test, due to half of the raw area being sealed by the electrode holder.

The samples in this work are all self-grown and respectively named M<sup>2</sup> (NiCo), M<sup>3</sup> (NiCoAl), M<sup>4</sup> (NiCoAlFe), and M<sup>5</sup> (NiCoAlFeCu) according to the kinds of metal elements contained in samples. The preparation process was as follows: the corresponding hydrates and the corresponding amount of urea were weighed and added into 60 mL of deionized water. Activated carbon cloth was immersed in the solution with magnetic stirring for 6 h. Subsequently, the solution and carbon cloth were transferred to a stainless steel autoclave with a Teflon liner for a hydrothermal reaction at 100 °C for 12 h. After the reaction was finished, the reaction vessel was cooled to room temperature in air and washed with deionized water and anhydrous ethanol 4 times alternatively. Finally, the samples were dried in a vacuum at 60 °C for 24 h. The amounts of each hydrate (0.002 mol) were as follows, 0.4752 g for  $\text{NiCl}_2 \cdot 6\text{H}_2\text{O}$ , 0.4756 g for  $\text{CoCl}_2 \cdot 6\text{H}_2\text{O}$ , 0.4826 g for  $\text{AlCl}_3 \cdot 6\text{H}_2\text{O}$ , 0.5404 g for  $\text{FeCl}_3 \cdot 6\text{H}_2\text{O}$ , and 0.3409 g for  $\text{CuCl}_2 \cdot 2\text{H}_2\text{O}$ . The weight of various hydrates was the same for different samples with only different types of hydrates added. To match the metal dosages, the urea dosages for different samples were as follows, 0.6 g for M<sup>2</sup>, 0.9 g for M<sup>3</sup>, 1.2 g for M<sup>4</sup>, and 1.5 g for M<sup>5</sup>. Details of the characterizations and tests were listed in the supplementary information too.

### 3. Characterization

41 The XRD data were measured using Rigaku Ultimate IV Powder X-ray from Japan,  
42 whose X-ray source was Cu K $\alpha$ , with a wavelength of 1.5418 Å, a voltage of 40 kV,  
43 and a current of 40 mA. Transmission electron microscope (TEM) images were  
44 obtained through Hitachi HT-7800, and selected area electron diffraction (SEAD) and  
45 high-resolution TEM (HR-TEM) images were taken through FEI TF-G20. Scanning  
46 electron microscopy (SEM) observations were performed with the aid of Hitachi  
47 Regulus 8100 and FEI QUANTA 250 FEG. Fourier Transform infrared spectroscopy  
48 (FT-IR) was obtained by Thermo Scientific Nicolet iS20, and the test was performed  
49 by acquiring the background and then the IR spectrum of the sample, with a resolution  
50 is 4 cm<sup>-1</sup>, 32 scans, and a test wavenumber range of 400-4000 cm<sup>-1</sup>. The XPS data were  
51 obtained by Thermo Scientific K-Alpha with an excitation source of Al K $\alpha$  rays  
52 (h $\nu$ =1486.6 eV), and the sample was fed into the analysis chamber when the pressure  
53 in the chamber was less than 2.0×10<sup>-7</sup> mbar. The testing spot size is 400 μm, with an  
54 operating voltage of 12 kV, and a filament current of 6 mA. The full-spectrum scan  
55 fluence energy was 150 eV in steps of 1 eV; the narrow-spectrum scan fluence energy  
56 was 50 eV in steps of 0.1 eV, and the narrow-spectrum signal was accumulated for at  
57 least 5 cycles. The data were rectified based on C1s = 284.80 eV binding energy as  
58 standard. The UV-vis DRS test was conducted using Shimadzu UV-3600i Plus, with a  
59 starting wavelength of 800 nm and an ending wavelength of 200 nm, a data interval of  
60 1.0 nm, a scanning speed of medium speed, and a slit width of 20. The Tauc plot is  
61 obtained by modifying Tauc's method according to Equation S1. The Mott-Schottky  
62 plots were obtained through the impedance potential (IMPE) test with the aid of CHI  
63 760E in a three-electrode system, including prepared samples loaded on FTO  
64 conductive glass (20 mm×10 mm×1.1 mm,  $\rho$  is about 15 Ω) as work electrode, Pt plate  
65 as the counter electrode, Ag/AgCl as the reference electrode, and 0.5 M Na<sub>2</sub>SO<sub>4</sub> as  
66 electrolyte. The IMPE testing parameters are as follows, the amplitude is 0.01 V, the  
67 frequency is 1000 Hz, and the testing voltage range is set with a stable open circuit  
68 voltage as the center and a width of 1 V. The data processing is based on Equation S2.

#### 69 **4. Electrochemical test**

70 All electrochemical performances were tested via the CHI 760E. All three electrode  
71 systems run in the PTFE electrolytic cell. Due to all prepared samples being self-grown  
72 samples, the performances of naked carbon cloth (CC) which experienced activating  
73 treatment was also tested, to eliminate the influence of the substrate.

#### 74 **4.1 OER Electrocatalysis:**

75 The electrocatalytic oxygen evolution reaction (OER) performances of samples  
76 were tested in a three-electrode system, containing a working electrode with a total  
77 exposed area of 1 cm<sup>2</sup>, a graphite rod (Φ6 mm×60 mm, immersed length 20 mm) as the  
78 counter electrode, and a Hg/HgO as a counter electrode with an electrolyte of 1 M KOH.  
79 Oxygen was continuously introduced into the electrolyte for 30 min before the test to  
80 fix the reversible potential of oxygen. Before the OER performance tests, we apply CV  
81 method cycled (20 times) the test system at a small scan rate of 5 mV/s to activate it.  
82 The voltage range for this CV cycle (activated process) was 0-0.7V (vs Hg/HgO  
83 reference electrode potential), which totally covers the pseudocapacitive reaction rang.  
84 All tests were performed without automatically IR compensation. Linear sweep

85 voltammetry (LSV) tests were performed at a scan rate of 5 mV s<sup>-1</sup>. The calculation of  
 86 potential is based on Eqs. S3-S5. A linear fit was performed to obtain the Tafel slope  
 87 according to Eq. S6 and LSV data. The cyclic voltammetry (CV) tests were carried out  
 88 at a scan rate of 10 mV, 20 mV, 40 mV, 60 mV, 80 mV, and 100 mV, taking the  
 89 potential of 0.1 V (vs Hg/HgO) in the non-Faraday reaction interval as the center and  
 90 taking the potential window of 0.1 V. The average currents of the CV curves obtained  
 91 at 0.1 V for each scan rate were taken and linearly fitted according to Eq. S7-S8 to get  
 92 the corresponding C<sub>dl</sub> values for each sample. Before EIS tests, the stable open circuit  
 93 potential is tested through the open circuit potential-time (OCPT) function, which is  
 94 used as the bias voltage for EIS testing. OER catalysis stability of samples was tested  
 95 by the multi-current steps (ISTEP) function, but each test was set for only one step of  
 96 current, allowing the sample to run at a constant current for an extended period to  
 97 observe the overpotential changes. Data of 10 mA and 100 mA constant current tests  
 98 are saved by least-squares smoothing skipped 21 and 49 points, respectively. For an in-  
 99 depth analysis of the material evolutions before and after the long-time constant current  
 100 test, CV with a potential window of 0-0.7 V (vs Hg/HgO) and EIS were performed after  
 101 every constant current test, and the EIS curves after each constant current test were not  
 102 fitted for a realistic and intuitive comparison. After a total duration of 32 h in the 10  
 103 mA constant current test, two 500 cycles of CV scans with a scanning rate of 100 mV  
 104 were performed on the tested sample in the range of 0-0.7V (vs Hg/HgO). The  
 105 corresponding EIS was also tested after both 500 cycles of CV tests.

#### 106 **4.2 Pseudocapacitive energy storage:**

107 The pseudocapacitive energy storage tests were implemented in a three-electrode  
 108 system with a Pt plate (10 mm×15 mm×0.1 mm) as the counter electrode, Hg/HgO as  
 109 the reference electrode, and 1 M KOH as the electrolyte. The galvanostatic  
 110 charge/discharge (GCD) curve obtained by chronopotentiometry test, sets the  
 111 corresponding current according to the actual load and current density value of the  
 112 sample. Specific capacitances were calculated by Eqs. S9-S10. According to Eq. S11,  
 113 all coulombic efficiencies are calculated from the charge/discharge energy values  
 114 counted in the CHI 760 exported data. The capacitance retention of cyclic charging and  
 115 discharging is calculated by taking the discharge capacity of an integer multiple of 500  
 116 cycles. The fact total charge and discharge cycles are 10000 cycles. The EIS test bias  
 117 voltage uses a stable open circuit potential.

#### 118 **5. Equation used:**

$$119 \quad (\alpha h\nu)^n = K(h\nu - E_g) \quad (S1)$$

120 where  $\alpha$  is absorption value;  $h$  is Planck constant;  $\nu$  is frequency;  $E_g$  is the band gap;  
 121 and  $n$  takes 2. The  $E_g$  was obtained from the x-intercept by corresponding linear fitting  
 122 <sup>1, 2</sup>.

$$123 \quad \frac{1}{C^2} = \frac{2}{\epsilon\epsilon_0 e N_d} \left( V - V_{FB} - \frac{K_B T}{e} \right) \quad (S2)$$

124 where  $C$  is interfacial capacitance (F cm<sup>-2</sup>);  $N_d$  is the carrier density (cm<sup>-3</sup>);  $V$  is the  
 125 applied potential;  $e$  is an elementary charge;  $K$  is the Boltzmann's constant ( $1.38 \times 10^{-23}$

126  $\text{F m}^{-1}$ ); T is the absolute temperature (K); and  $V_{\text{FB}}$  is flat band potential. The  $V_{\text{FB}}$  could  
 127 be obtained by linear fitting based on Equation S2 <sup>3, 4</sup>.

128 The potentials obtained by Hg/HgO as reference electrode were converted to a  
 129 reversible hydrogen electrode (RHE) by the following Equation S3 <sup>5</sup>:

$$130 \quad E_{\text{RHE}} = E_{\text{Hg/HgO}} + 0.0592 \times \text{PH} + 0.098 \quad (\text{S3})$$

131 The potentials obtained by Ag/AgCl as reference electrode were converted to a  
 132 reversible hydrogen electrode (RHE) by the following Equation S4 <sup>6</sup>:

$$133 \quad E_{\text{RHE}} = E_{\text{Ag/AgCl}} + 0.0592 \times \text{PH} + 0.197 \quad (\text{S4})$$

134 The overpotential ( $\eta$ ) of OER is calculated by the following Equation S5 <sup>5</sup>:

$$135 \quad \eta = E_{\text{RHE}} - 1.23 \quad (\text{S5})$$

136 The Tafel value is calculated by linear fitting slope value according to the following  
 137 Equation S6:

$$138 \quad \eta = a + b \log_{10} |i| \quad (\text{S6})$$

139 where the  $\eta$  is overpotential and  $i$  is current density <sup>6</sup>.

140 The electrochemical active area (ECSA) is proportional to double-layer capacitance  
 141 ( $C_{\text{dl}}$ ) as seen in the following Equation S7:

$$142 \quad \text{ECSA} = C_{\text{dl}}/C_s \quad (\text{S7})$$

143 where the  $C_s$  is the specific capacitance of the corresponding surface smooth sample  
 144 under the same conditions <sup>7</sup>.

145 The double layer capacitance ( $C_{\text{dl}}$ ) is measured from the CV curves at different scan  
 146 rates based on the following Equation S8. The range of applied potentials taking no  
 147 significant Faraday process occurs is determined from the static CV curve, which is  
 148 operated through a potential window of 0.1 V at the center of the open circuit potential  
 149 (OCP).

$$150 \quad i_c = v C_{\text{dl}} \quad (\text{S8})$$

151 where the  $i_c$  is the current (A) of the double-layer capacitor and  $v$  is the applied potential  
 152 (V) <sup>7</sup>.

153 The specific capacitances based on GCD curves are calculated according to the  
 154 following Equation S9:

$$155 \quad C_m = 2I \int v dt / m \Delta V \quad (\text{S9})$$

156 where  $C_m$  is specific capacitance ( $\text{F g}^{-1}$ ); I is current (A); V is applied potential (V); m  
 157 is loading mass of active material;  $\Delta V$  is working potential window <sup>8</sup>.

158 The specific capacitances based on CV curves are calculated according to the  
 159 following Equation S10:

$$160 \quad C = \frac{A}{2mk(\Delta V)} \quad (\text{S10})$$



161 where C is specific capacitance ( $\text{F g}^{-1}$ ); A is the area of CV curve covered; k is scan  
162 rate; m is loading mass of active material;  $\Delta V$  is working potential window <sup>9</sup>.

163 The coulombic efficiency is calculated according to Equation S11 <sup>8</sup>:

$$\text{EFc} = \frac{\text{Energy density}(\text{discharge})}{\text{Energy density}(\text{charge})} \quad (\text{S11})$$

165 where the EFc is coulombic efficiency; the energy densities (charge/discharge) were  
166 obtained from statistical results of the chronopotentiometry test by CHI760.

167

168

169

170

171

172

173

174

175

176

177

178

179

180

181

182

183

184

185

186

187

188

189

190

191

192

193

194

195

196

197

198

199

200

201

202

203  
204  
205  
206  
207

## 208 RESULTS

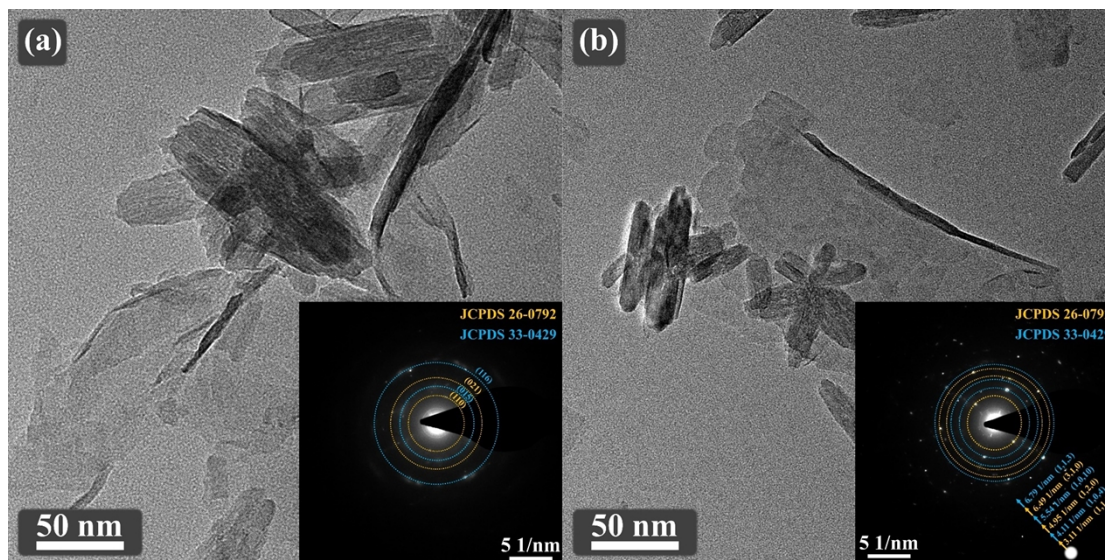

Figure S1 BF-TEM image and corresponding SAED of M<sup>5</sup>.

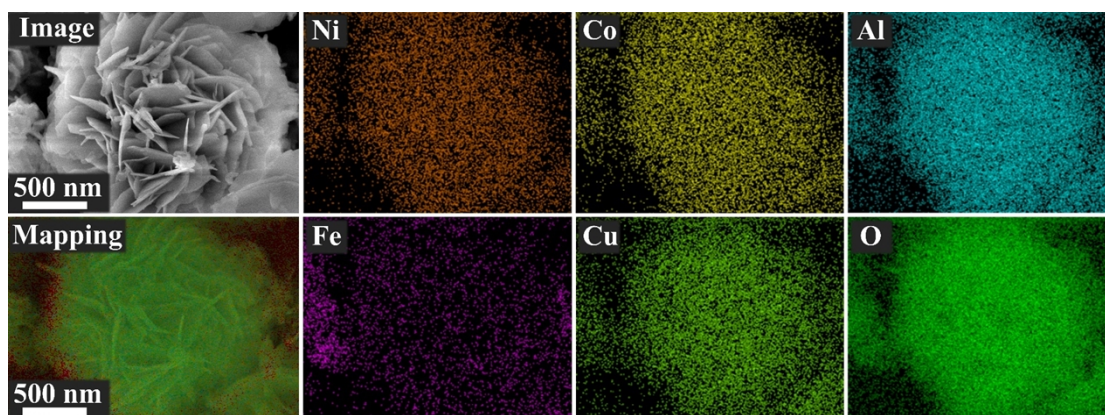

Figure S2 SEM image and corresponding area elements mappings.

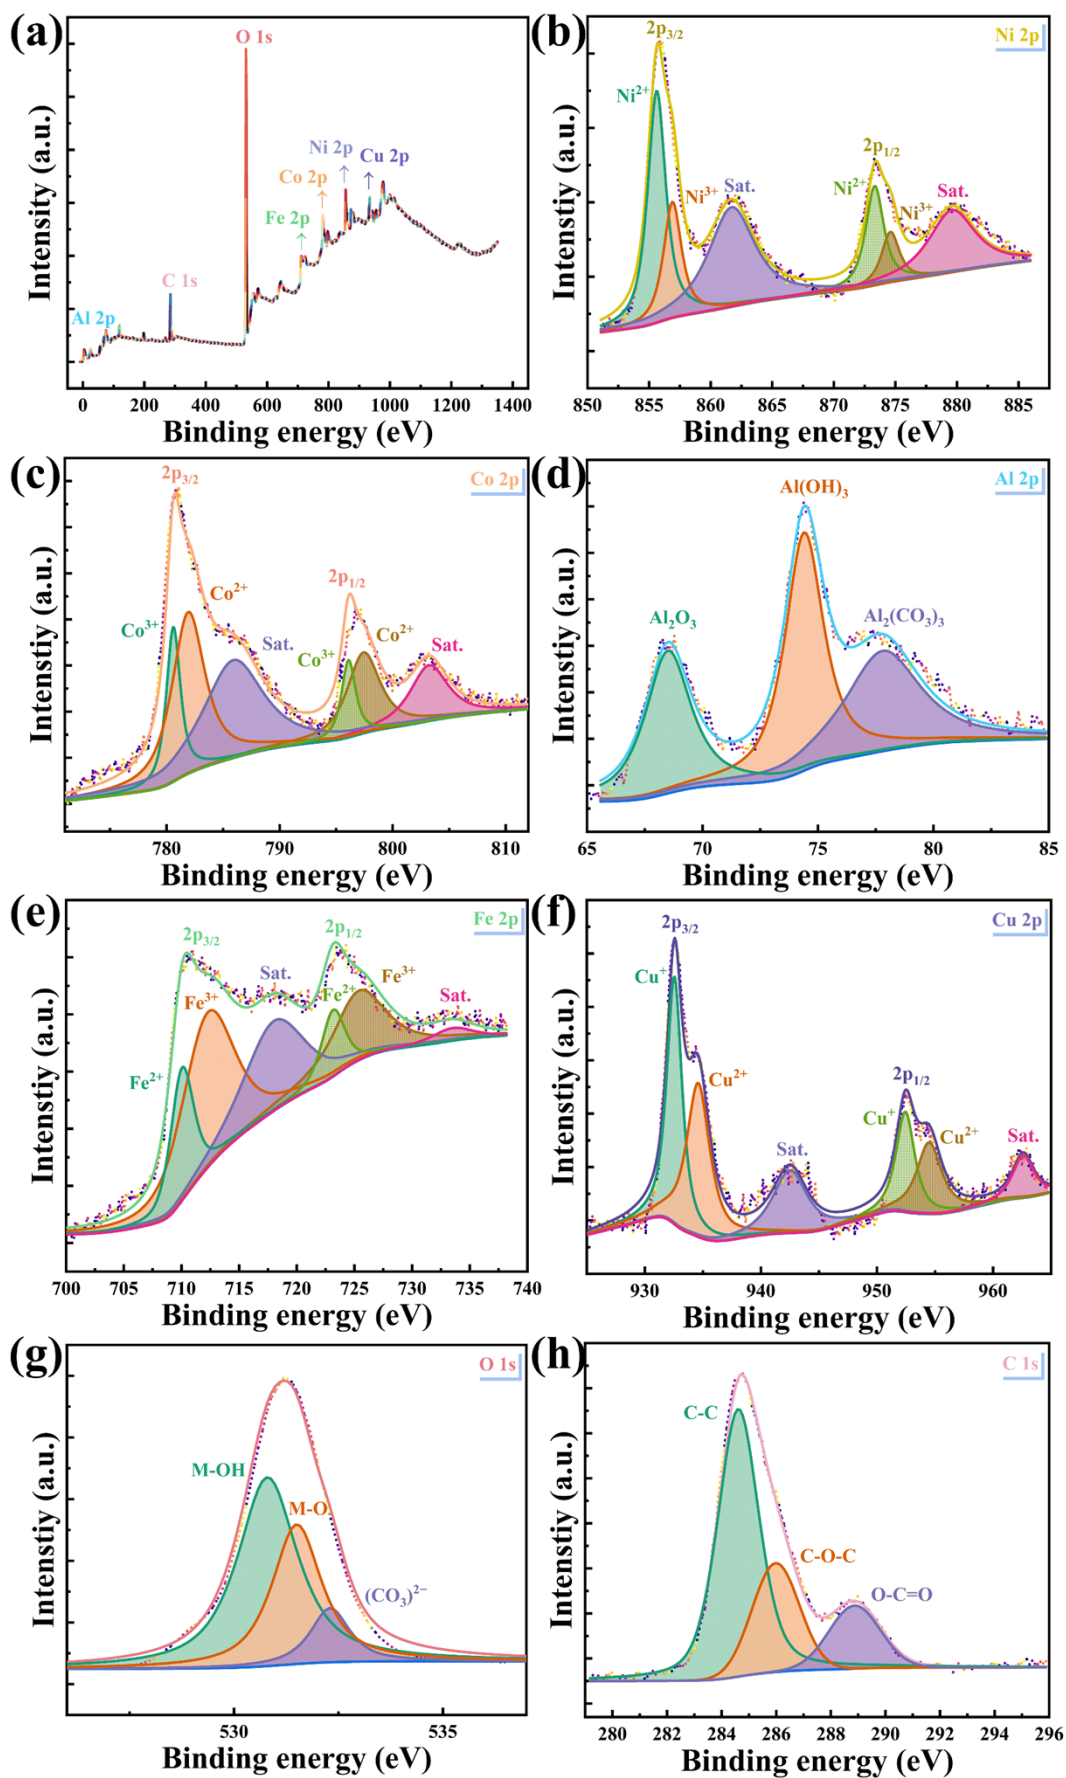

256

257 Figure S3 (a) XPS survey spectra, and (b)-(h) high-resolution XPS of different elements of M<sup>5</sup>.

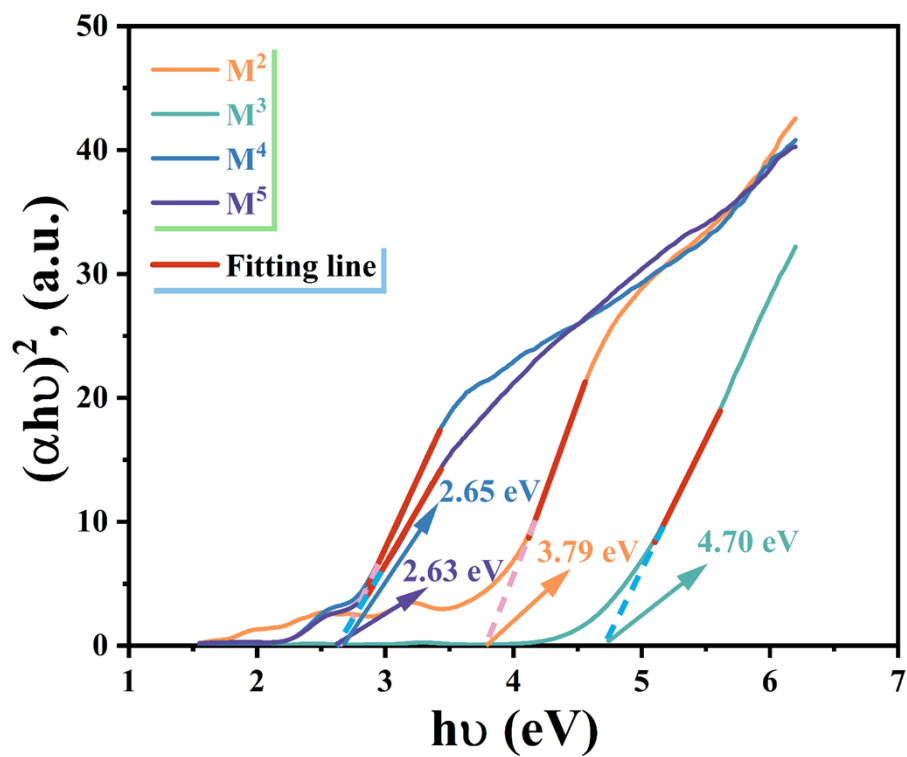

Figure S4 Tauc plot based on UV-vis results of  $M^2$ ,  $M^3$ ,  $M^4$ , and  $M^5$ .

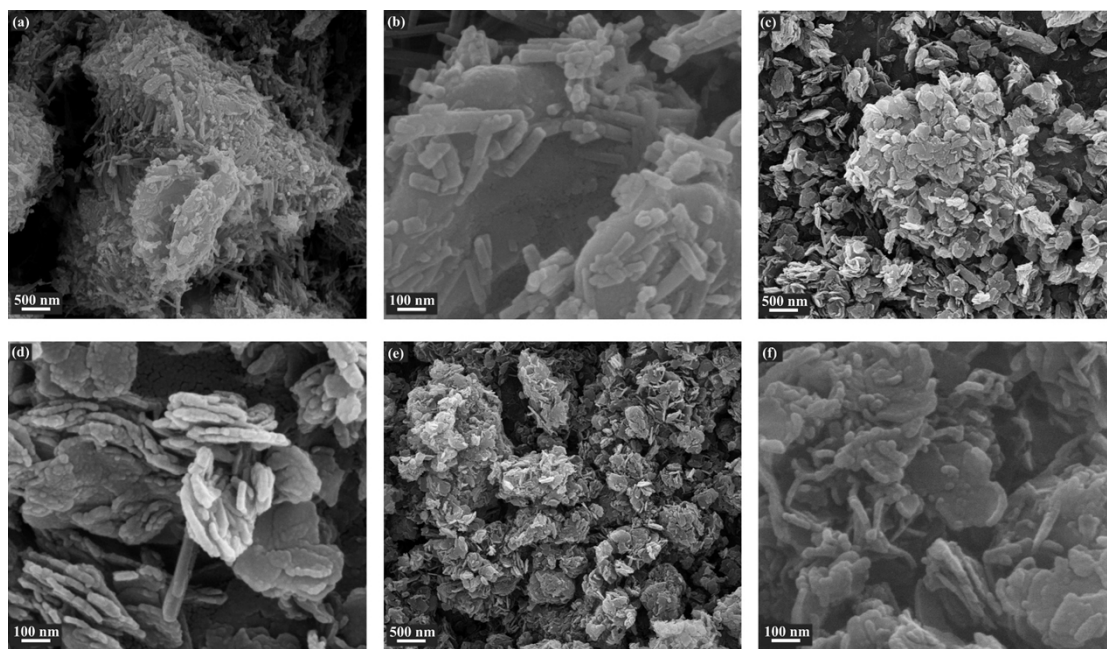

Figure S5 SEM images of (a)-(b)  $M^2$ , (c)-(d)  $M^3$ , (e)-(f)  $M^4$ .

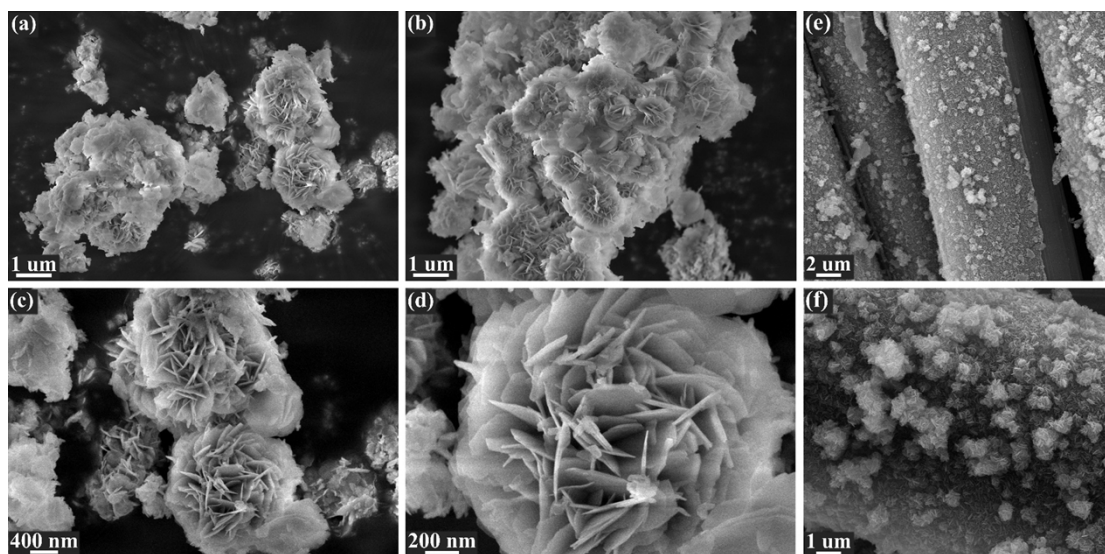

Figure S6 Different magnification SEM images: of (a)-(d) M<sup>5</sup> powder sample, and (e)-(f) M<sup>5</sup> electrode sample.



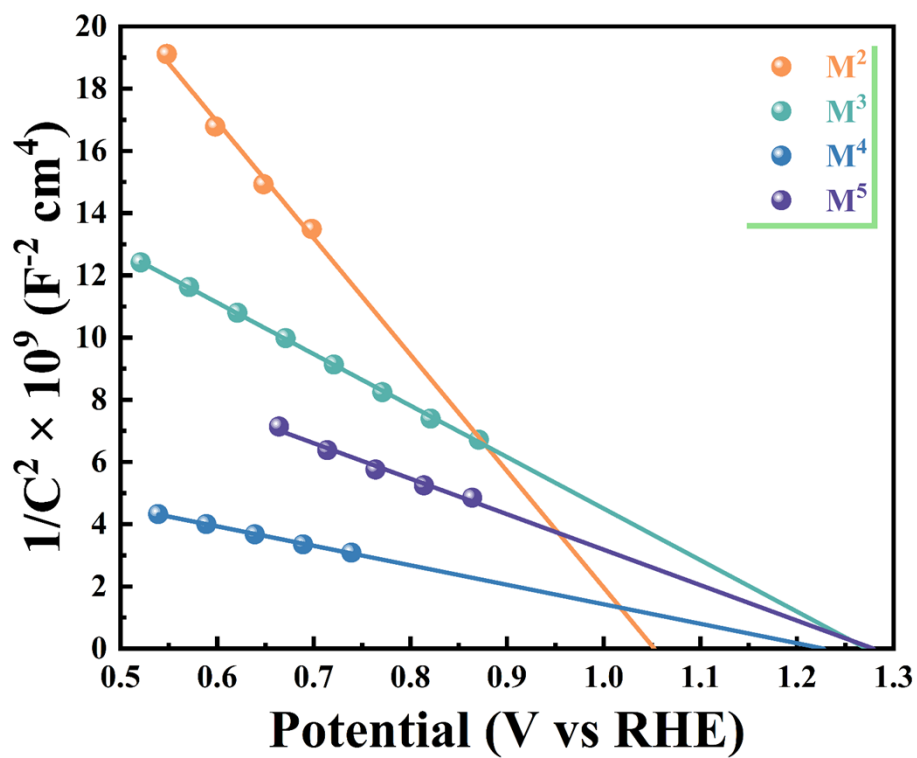

Figure S7 Mott-Schottky plot of  $M^2$ ,  $M^3$ ,  $M^4$ , and  $M^5$ .

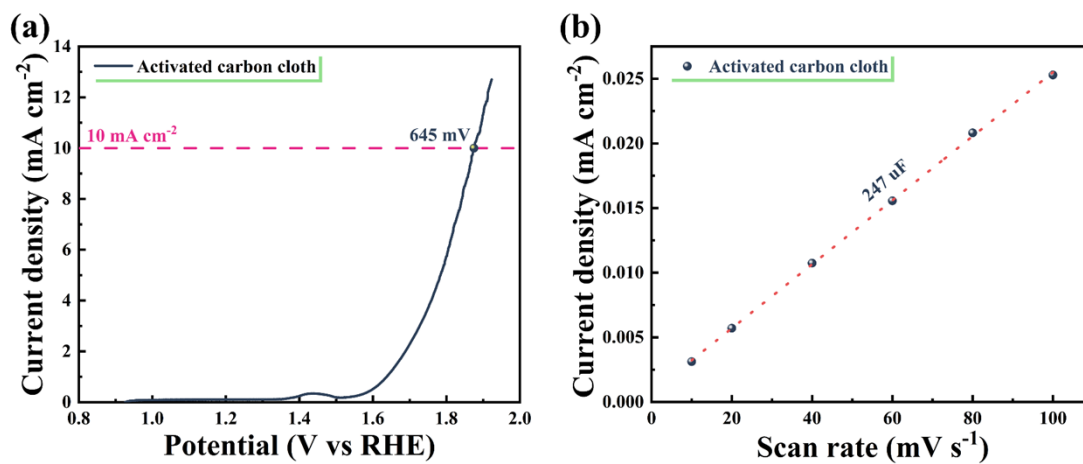

Figure S8 (a) LSV curve at 5 mV s<sup>-1</sup> and (b) C<sub>dl</sub> of activated carbon cloth.

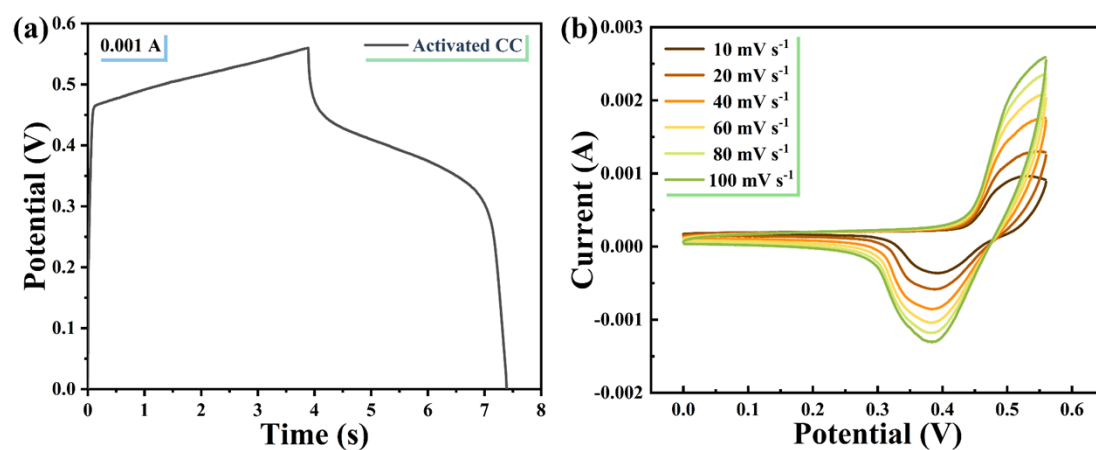

Figure S9 (a) GCD curves at 1 mA and (b) CV curves at different scan rates of activated carbon cloth.

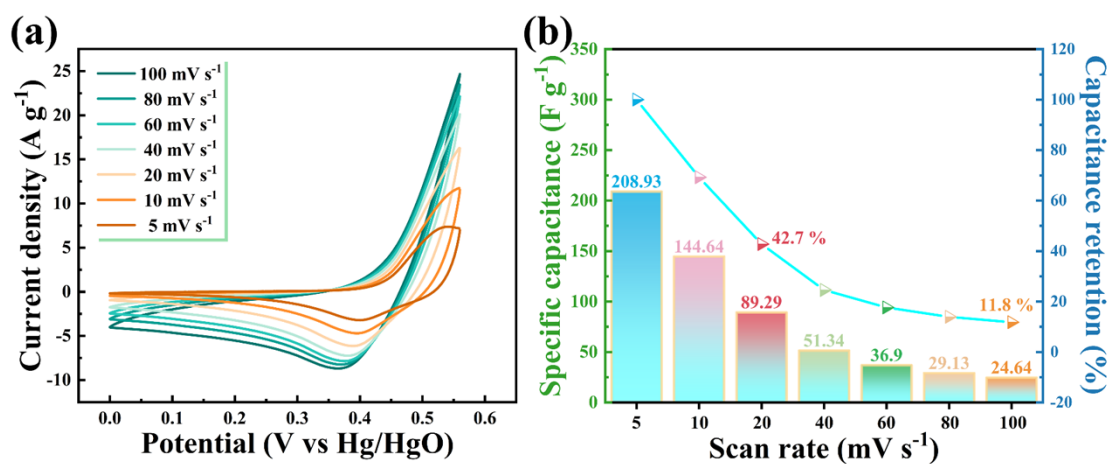

Figure S10 (a) CV curves at different scan rates and (b) specific capacitance and rate capacity of M<sup>5</sup> calculated by CV curves.

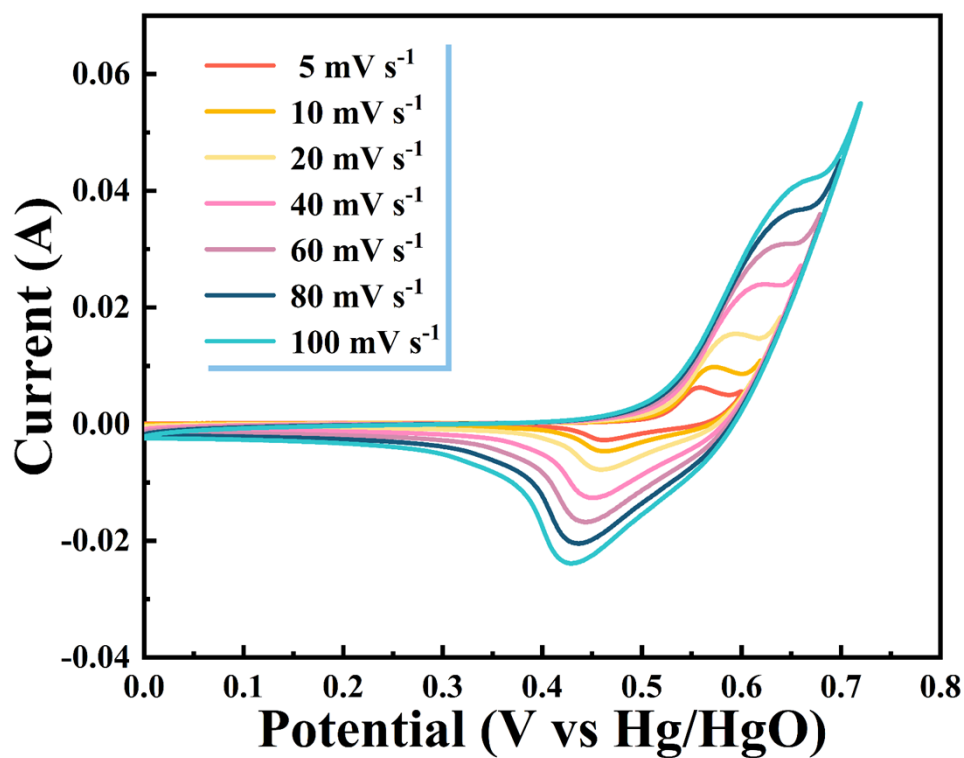

458

459 Figure S11 CV curves at different scan rates and different potential windows of  $M^5$  (Activated by  
 460 CV 20-cycles among 0-0.6 V).  
 461

462

463

464

465

466

467

468

469

470

471

472

473

474

475

476

477

478

479

480

481

482

483

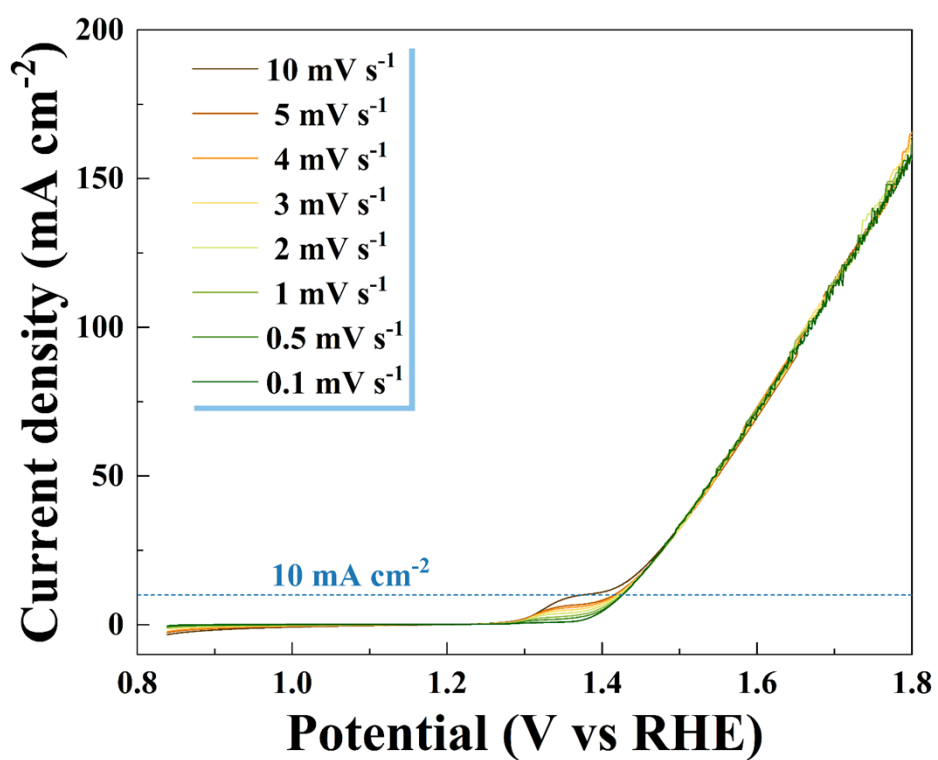

Figure S12 The LSV curves of  $M^5$  at different scan rate.

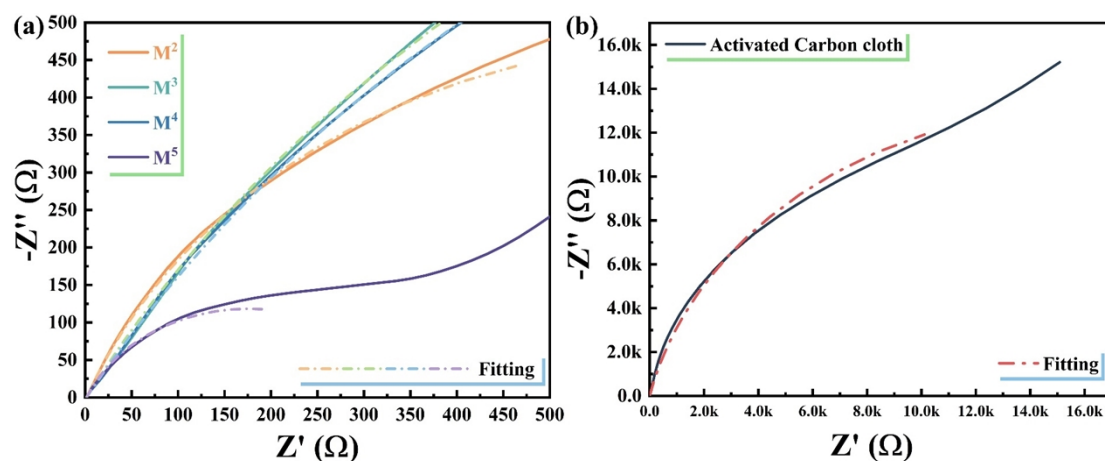

Figure S13 The EIS for OER of (a)  $M^2$ ,  $M^3$ ,  $M^4$ , and  $M^5$ , and (b) activated carbon cloth.

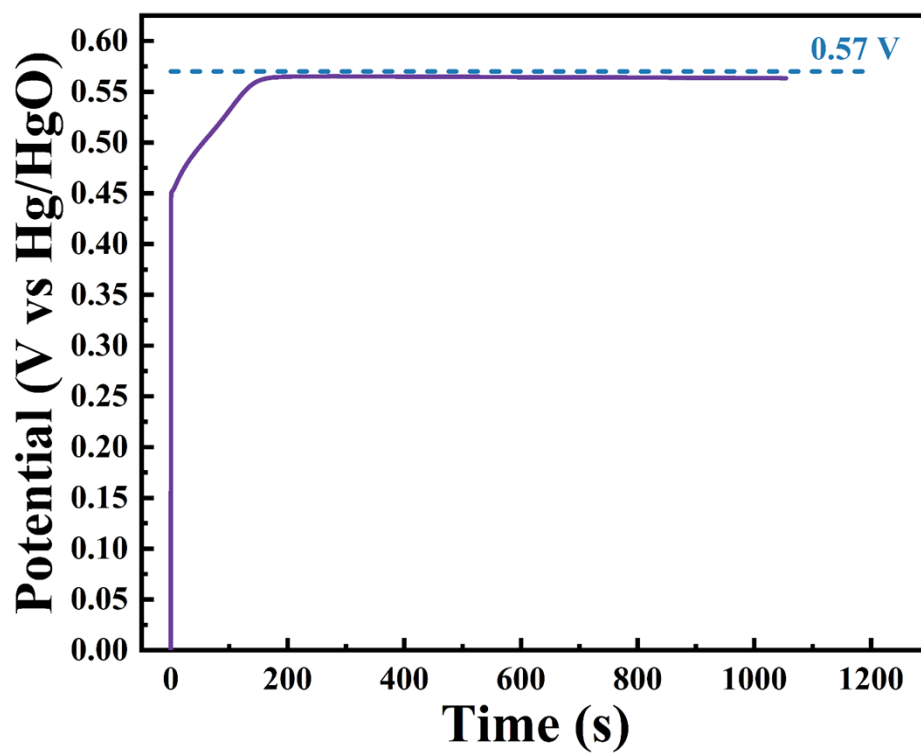

Figure S14 The charge curve of  $M^5$  via chronopotentiometry at  $1 \text{ A g}^{-1}$ .



570

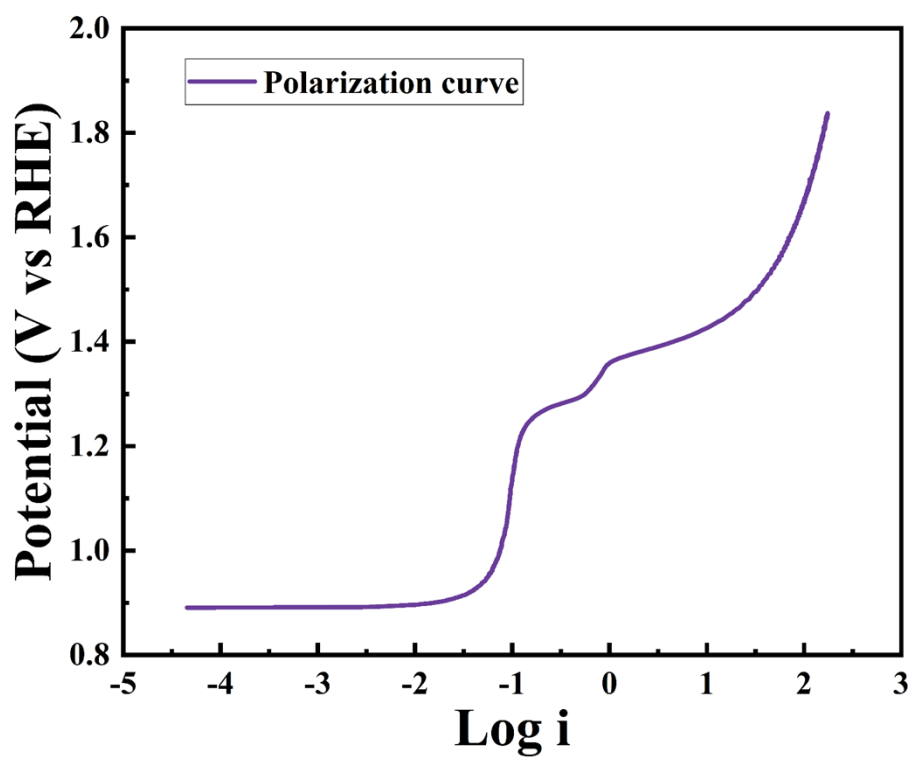

571

Figure S15 The polarization curves obtained by LSV at 0.1 mV s<sup>-1</sup> (Quasi steady state).

572

573

574

575

576

577

578

579

580

581

582

583

584

585

586

587

588

589

590

591

592

593

594

595

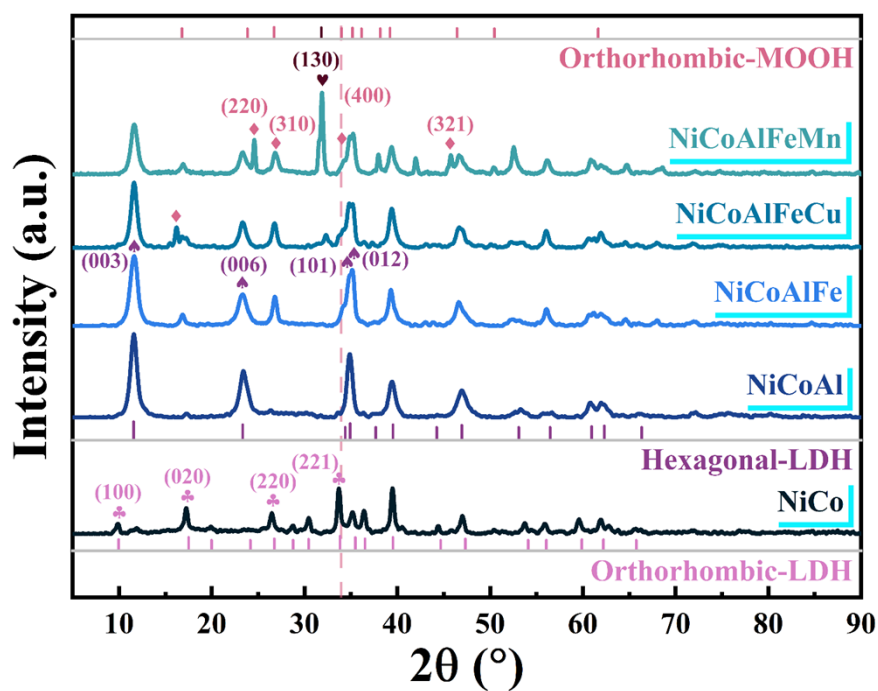

Figure S16 The XRD results of NiCoAlFeMn sample and comparison with the previously prepared samples.

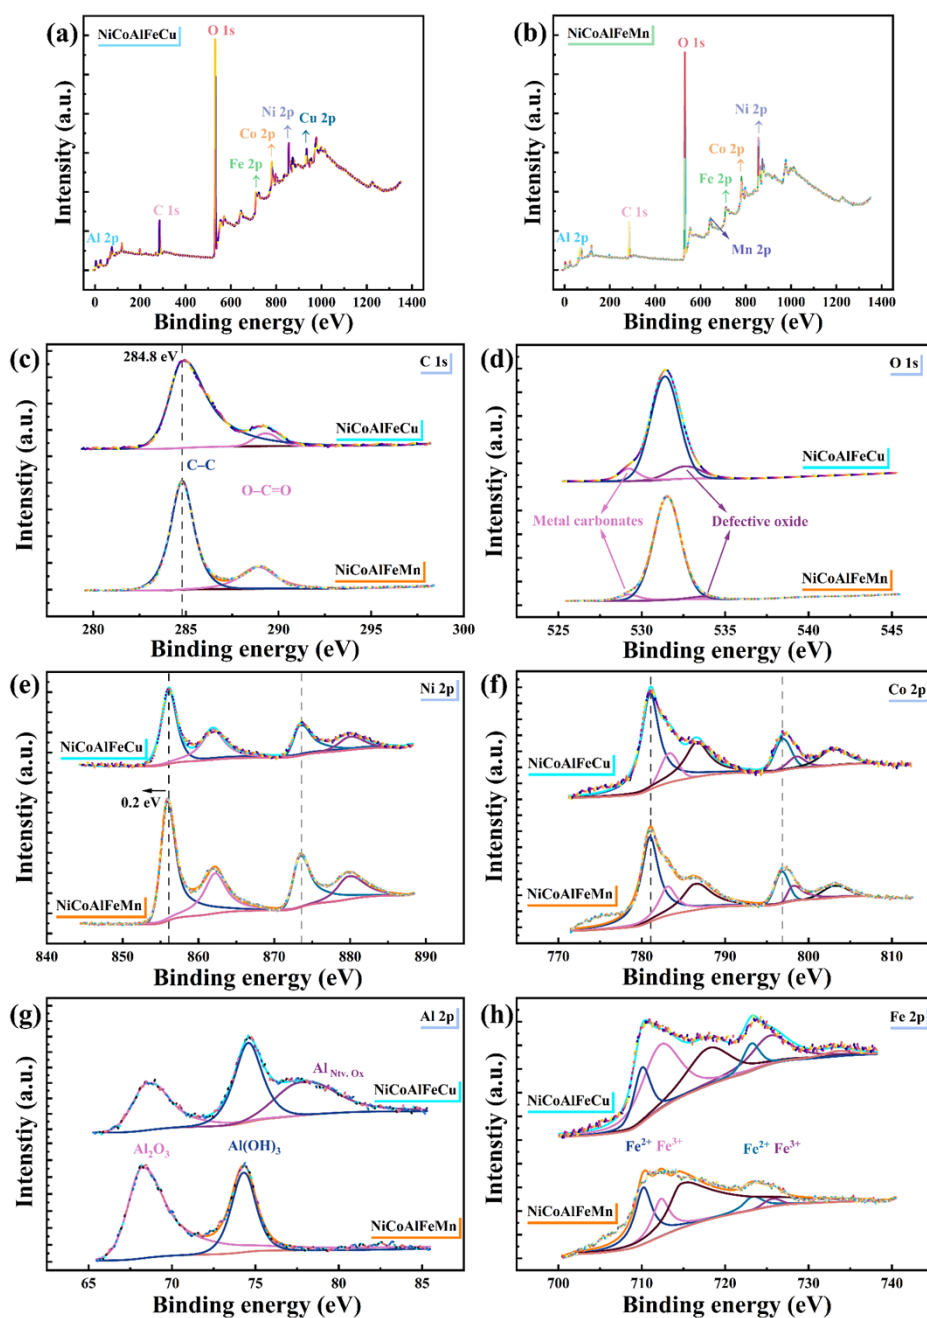

Figure S17 The XPS results of NiCoAlFeMn sample and it compares with the prepared M<sup>5</sup> sample.

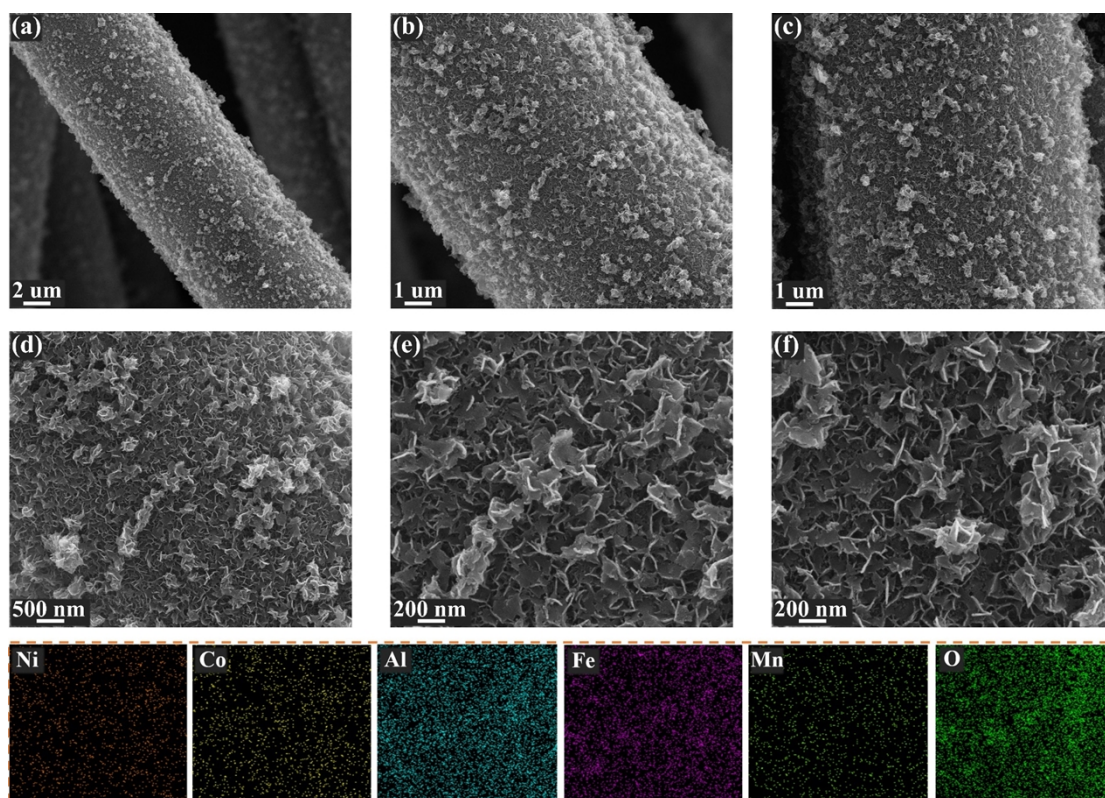

Figure S18 The SEM images and elements mapping of NiCoAlFeMn sample.

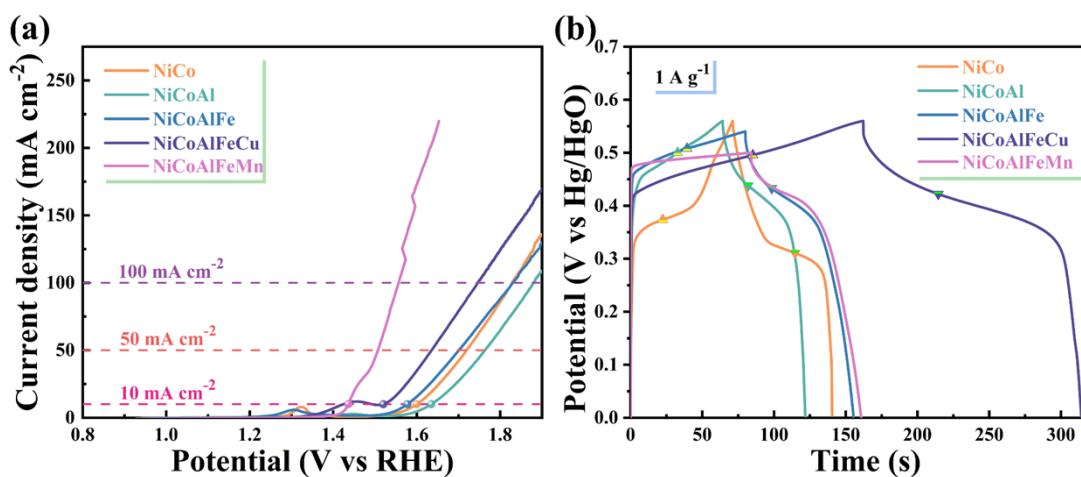

Figure S19 (a) LSV curves at  $5 \text{ mV s}^{-1}$  and (b) GCD curves at  $1 \text{ A g}^{-1}$  of NiCoAlFeMn sample and comparison with the previously prepared samples.

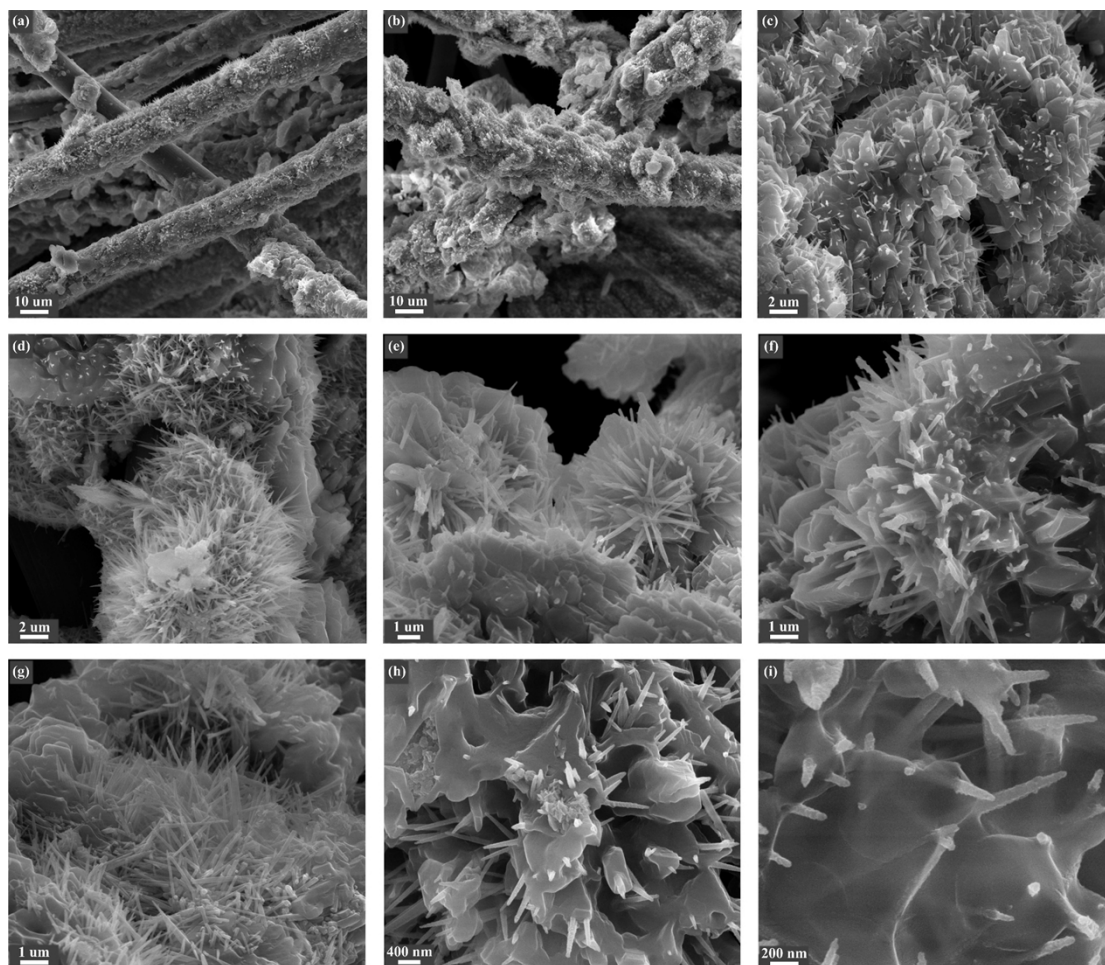

Figure S20 Different magnification SEM images of  $M^5$  after 20 h constant current test at  $100 \text{ mA cm}^{-2}$ .

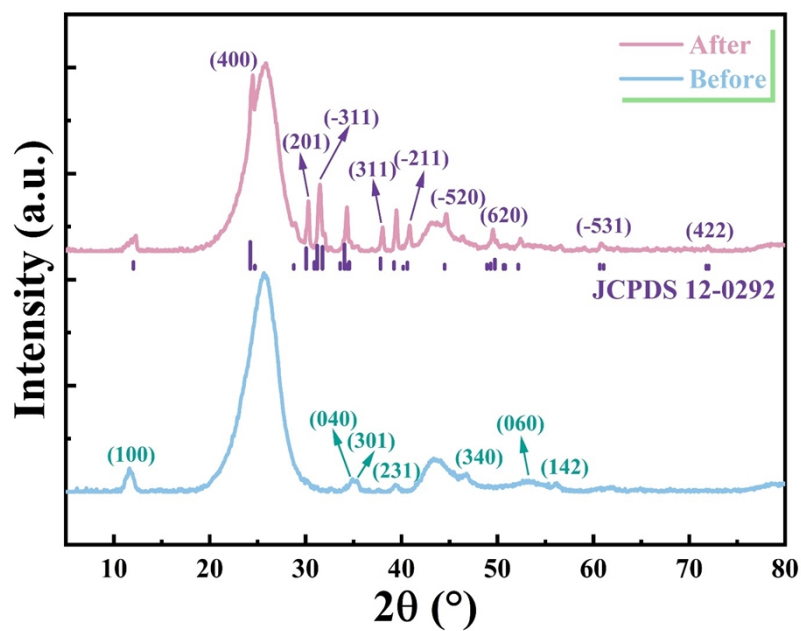

Figure S21 XRD of  $M^5$  sample before and after 20 h constant current test at  $100 \text{ mA cm}^{-2}$ .

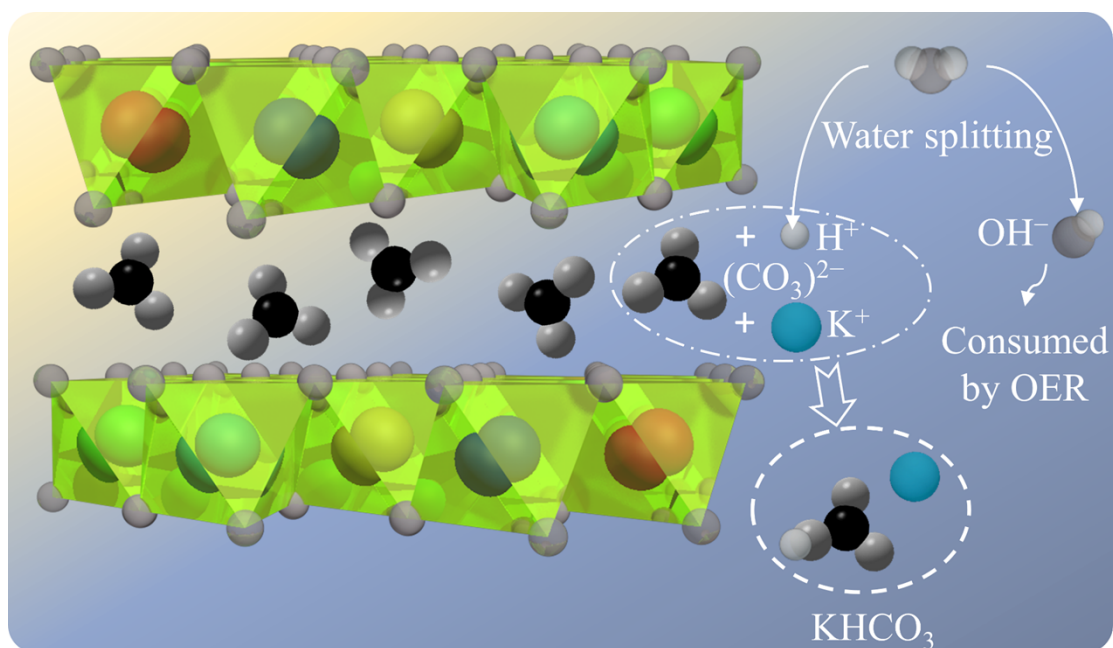

Figure S22 The schematic diagram for the formation  $\text{KHCO}_3$ .



756

Table S1 Proportion of different elements at corresponding STEM area.

| Element | Weight % | Atomic % | Correction |
|---------|----------|----------|------------|
| C(K)    | 49.94    | 72.33    | 0.28       |
| O(K)    | 14.98    | 16.28    | 0.51       |
| Al(K)   | 3.31     | 2.14     | 0.92       |
| Fe(K)   | 9.72     | 3.03     | 0.99       |
| Co(K)   | 3.83     | 1.13     | 0.99       |
| Ni(K)   | 4.46     | 1.33     | 0.99       |
| Cu(K)   | 13.76    | 3.76     | 0.99       |
| Total   | 100.00   | 100.00   |            |

757

758

759

760

761

762

763

764

765

766

767

768

769

770

771

772

773

774

775

776

777

778

779

780

781

782

783

784

785

786

787

788

789

790

791

792 Table S2 Proportion of different elements corresponding to the elements mapping area by SEM.

| Element | Wt. %  | At. %  |
|---------|--------|--------|
| C(K)    | 48.53  | 64.78  |
| O(K)    | 27.74  | 27.80  |
| Al(K)   | 3.11   | 1.85   |
| Co(K)   | 7.84   | 2.13   |
| Ni(K)   | 7.86   | 2.15   |
| Fe(K)   | 1.14   | 0.33   |
| Cu(L)   | 3.72   | 0.94   |
| Si(K)   | 0.06   | 0.02   |
| Total   | 100.00 | 100.00 |

793

794

795

796

797

798

799

800

801

802

803

804

805

806

807

808

809

810

811

812

813

814

815

816

817

818

819

820

821

822

823

824

825

826

827

Table S3 ICP-OES results of different metallic elements in M<sup>5</sup>

| Elements | Molar ratio (at. %) | Approximate configuration<br>entropy |
|----------|---------------------|--------------------------------------|
| Al       | 23.7                | 1.6 R                                |
| Fe       | 18.9                |                                      |
| Co       | 17.8                |                                      |
| Ni       | 18.9                |                                      |
| Cu       | 20.7                |                                      |

828

829

830

831

832

833

834

835

836

837

838

839

840

841

842

843

844

845

846

847

848

849

850

851

852

853

854

855

856

857

858

859

860

861

862

863

864

Table S4 Comparing the OER overpotentials and specific capacitance of this work with diverse LDH and High entropy materials.

| Material                                                                                                   | OER overpotential (mV, at 10 mA cm <sup>-2</sup> ) | Specific capacitance (F g <sup>-1</sup> at 1 A g <sup>-1</sup> ) | Electrolyte | Reference |
|------------------------------------------------------------------------------------------------------------|----------------------------------------------------|------------------------------------------------------------------|-------------|-----------|
| NiCo-LDH                                                                                                   | 388                                                |                                                                  | 1M KOH      | 10        |
| NiFe-LDH                                                                                                   | 348                                                |                                                                  | 0.1 M KOH   | 11        |
| NiFe-LDH                                                                                                   | 360                                                |                                                                  | 1M KOH      | 12        |
| NiFe-LDH                                                                                                   | 345                                                |                                                                  | 1M KOH      | 10        |
| CoFe-LDH                                                                                                   | 404                                                |                                                                  | 0.1 M KOH   | 11        |
| Co <sub>1.8</sub> Ni-LDH                                                                                   | 290                                                |                                                                  | 1 M KOH     | 13        |
| CoFe-LDH@NiFe-LDH                                                                                          | 360                                                |                                                                  | 1 M KOH     | 14        |
| CoAl-LDH                                                                                                   | 340                                                |                                                                  | 1 M KOH     | 15        |
| La <sub>0.6</sub> Sr <sub>0.4</sub> Co <sub>0.8</sub> Fe <sub>0.2</sub> O <sub>3</sub>                     | 353                                                |                                                                  | 1 M KOH     | 16        |
| La <sub>0.6</sub> Sr <sub>0.4</sub> Co <sub>0.8</sub> Fe <sub>0.1</sub> Mn <sub>0.1</sub> O <sub>3-δ</sub> | 343                                                |                                                                  | 1 M KOH     | 17        |
| LiFe <sub>0.8</sub> Co <sub>0.1</sub> Ni <sub>0.1</sub> O <sub>2</sub>                                     | 400                                                |                                                                  | 0.1 M KOH   | 18        |
| Fe-Cr-Co-Ni-Cu-LDH                                                                                         | 330                                                |                                                                  | 1 M KOH     | 19        |
| Fe-Cr-Co-Ni-Cu-LDH                                                                                         | 430                                                |                                                                  | 1 M KOH     | 19        |
| NiCo-LDH                                                                                                   |                                                    | 1962                                                             | 6 M KOH     | 20        |
| NiCo-LDH/NF                                                                                                |                                                    | 2103                                                             | 2 M KOH     | 21        |
| MnOOH/NiAl-LDH                                                                                             |                                                    | 1331.11                                                          | 6 M KOH     | 22        |
| MgCoAl-LDH                                                                                                 |                                                    | 381.3                                                            | 1 M KOH     | 23        |
| (FeCoCrMnZn) <sub>3</sub> O <sub>4</sub>                                                                   |                                                    | 340.3                                                            | 1 M KOH     | 24        |
| (CoCrFeMnNi) <sub>3</sub> O <sub>4</sub>                                                                   |                                                    | 228                                                              | 2 M KOH     | 25        |
| FeOOH/NiCoAlFeCu-LDH                                                                                       | 288                                                | 215.4                                                            | 1 M KOH     | This work |

## 877 References

- 878 1. N. F. Mott, E. A. Davis and K. Weiser, Electronic processes in non-crystalline  
879 materials, *Physics Today*, 1972, **25**, 55.
- 880 2. P. Makula, M. Pacia and W. Macyk, How to correctly determine the band gap  
881 energy of modified semiconductor photocatalysts based on UV-Vis spectra,  
882 *Journal of Physical Chemistry Letters*, 2018, **9**, 6814-6817.
- 883 3. Z. Yang, X. Xie, J. Wei, Z. Zhang, C. Yu, S. Dong, B. Chen, Y. Wang, M. Xiang  
884 and H. Qin, Interface engineering Ni/Ni<sub>12</sub>P<sub>5</sub>@CN<sub>x</sub> Mott-Schottky  
885 heterojunction tailoring electrocatalytic pathways for zinc-air battery, *Journal*  
886 *of Colloid Interface Science*, 2023, **642**, 439-446.
- 887 4. Y. Xiao, C. Feng, J. Fu, F. Wang, C. Li, V. F. Kunzelmann, C.-M. Jiang, M.  
888 Nakabayashi, N. Shibata, I. D. Sharp, K. Domen and Y. Li, Band structure  
889 engineering and defect control of Ta<sub>3</sub>N<sub>5</sub> for efficient photoelectrochemical  
890 water oxidation, *Nature Catalysis*, 2020, **3**, 932-940.
- 891 5. M. K. Adak, A. Rajput, D. Ghosh and B. Chakraborty, Role of Fe–O–M bond in  
892 controlling the electroactive species generation from the FeMO<sub>4</sub> (M: Mo and W)  
893 electro(pre)catalyst during OER, *ACS Applied Energy Materials*, 2022, **5**,  
894 13645-13660.
- 895 6. H. Jin, X. Liu, P. An, C. Tang, H. Yu, Q. Zhang, H. J. Peng, L. Gu, Y. Zheng, T.  
896 Song, K. Davey, U. Paik, J. Dong and S. Z. Qiao, Dynamic rhenium dopant  
897 boosts ruthenium oxide for durable oxygen evolution, *Nature Communications*,  
898 2023, **14**, 354.
- 899 7. Zeenat, Z. Ahmad, A. Maqbool, M. Asif Hussain, R. Adel Pashameah, A.  
900 Shahzadi, N. Nazar, S. Iqbal, A. K. Alanazi, M. Naeem Ashiq and H. M. Abo-  
901 Dief, One-pot solvothermal synthesis of highly catalytic Janus transition metal  
902 phosphides (TMPs) for high performance OER, *Fuel*, 2023, **331**, 125913-  
903 125921.
- 904 8. W. Zhang, Z. Shahnava, X. Yan, X. Huang, S. Wu, H. Chen, J. Pan, T. Li and  
905 J. Wang, One-step solvothermal synthesis of raspberry-like NiCo-MOF for  
906 high-performance flexible supercapacitors for a wide operation temperature  
907 range, *Inorganic Chemistry*, 2022, **61**, 15287-15301.
- 908 9. F. Bahmani, S. H. Kazemi, H. Kazemi, M. A. Kiani and S. Yoones Feizabadi,  
909 Nanocomposite of copper–molybdenum–oxide nanosheets with graphene as  
910 high-performance materials for supercapacitors, *Journal of Alloys and*  
911 *Compounds*, 2019, **784**, 500-512.
- 912 10. F. Song and X. Hu, Exfoliation of layered double hydroxides for enhanced  
913 oxygen evolution catalysis, *Nature Communications*, 2014, **5**, 4477.
- 914 11. F. Dionigi, Z. Zeng, I. Sinev, T. Merzdorf, S. Deshpande, M. B. Lopez, S.  
915 Kunze, I. Zegkinoglou, H. Sarodnik, D. Fan, A. Bergmann, J. Drnec, J. F.  
916 Araujo, M. Gliech, D. Teschner, J. Zhu, W. X. Li, J. Greeley, B. R. Cuenya and  
917 P. Strasser, In-situ structure and catalytic mechanism of NiFe and CoFe layered  
918 double hydroxides during oxygen evolution, *Nature Communications*, 2020, **11**,  
919 2522.

- 920 12. S. Jaskaniec, C. Hobbs, A. Seral-Ascaso, J. Coelho, M. P. Browne, D. Tyndall,  
921 T. Sasaki and V. Nicolosi, Low-temperature synthesis and investigation into the  
922 formation mechanism of high quality Ni-Fe layered double hydroxides  
923 hexagonal platelets, *Science Report*, 2018, **8**, 4179.
- 924 13. W. Hu, Q. Liu, T. Lv, F. Zhou and Y. Zhong, Impact of interfacial CoOOH on  
925 OER catalytic activities and electrochemical behaviors of bimetallic Co<sub>x</sub>Ni-  
926 LDH nanosheet catalysts, *Electrochimica Acta*, 2021, **381**, 138276.
- 927 14. R. Yang, Y. Zhou, Y. Xing, D. Li, D. Jiang, M. Chen, W. Shi and S. Yuan,  
928 Synergistic coupling of CoFe-LDH arrays with NiFe-LDH nanosheet for highly  
929 efficient overall water splitting in alkaline media, *Applied Catalysis B: Environmental*, 2019, **253**, 131-139.
- 930 15. Y. Song, Z. Li, K. Fan, Z. Ren, W. Xie, Y. Yang, M. Shao and M. Wei, Ultrathin  
931 layered double hydroxides nanosheets array towards efficient electrooxidation  
932 of 5-hydroxymethylfurfural coupled with hydrogen generation, *Applied Catalysis B: Environmental*, 2021, **299**, 120669.
- 933 16. L. Zhang, H. Zhu, J. Hao, C. Wang, Y. Wen, H. Li, S. Lu, F. Duan and M. Du,  
934 Integrating the cationic engineering and hollow structure engineering into  
935 perovskites oxides for efficient and stable electrocatalytic oxygen evolution,  
936 *Electrochimica Acta*, 2019, **327**, 135033.
- 937 17. L. Tang, T. Fan, Z. Chen, J. Tian, H. Guo, M. Peng, F. Zuo, X. Fu, M. Li, Y. Bu,  
938 Y. Luo, J. Li and Y. Sun, Binary-dopant promoted lattice oxygen participation  
939 in OER on cobaltate electrocatalyst, *Chemical Engineering Journal*, 2021, **417**,  
940 129324.
- 941 18. L. Gui, G. Pan, X. Ma, M. You, B. He, Z. Yang, J. Sun, W. Zhou, J. Xu and L.  
942 Zhao, In-situ exsolution of CoNi alloy nanoparticles on LiFe<sub>0.8</sub>Co<sub>0.1</sub>Ni<sub>0.1</sub>O<sub>2</sub>  
943 parent: New opportunity for boosting oxygen evolution and reduction reaction,  
944 *Applied Surface Science*, 2021, **543**, 148817.
- 945 19. K. Gu, X. Zhu, D. Wang, N. Zhang, G. Huang, W. Li, P. Long, J. Tian, Y. Zou,  
946 Y. Wang, R. Chen and S. Wang, Ultrathin defective high-entropy layered  
947 double hydroxides for electrochemical water oxidation, *Journal of Energy Chemistry*, 2021, **60**, 121-126.
- 948 20. X. Zhang, W. Lu, Y. Tian, S. Yang, Q. Zhang, D. Lei and Y. Zhao, Nanosheet-  
949 assembled NiCo-LDH hollow spheres as high-performance electrodes for  
950 supercapacitors, *Journal of Colloid and Interface Science*, 2022, **606**, 1120-  
951 1127.
- 952 21. A. Tang, P. Chen and C. Mi, Ni-Co layered double hydroxide nanosheet array  
953 on nickel foam coated graphene for high-performance asymmetric  
954 supercapacitors, *Ionics*, 2020, **26**, 6277-6287.
- 955 22. X. Hua, C.-J. Mao, J.-S. Chen, P.-P. Chen and C.-F. Zhang, Facile synthesis of  
956 new-type MnOOH/NiAl-layered double hydroxide nanocomposite for high-  
957 performance supercapacitor, *Journal of Alloys and Compounds*, 2019, **777**, 749-  
958 758.
- 959 23. Y. Zhang and S. Wei, Mg-Co-Al-LDH nanoparticles with attractive  
960 electrochemical performance for supercapacitor, *Journal of Nanoparticle*  
961  
962  
963

- 964 *Research*, 2019, **21**, 14.
- 965 24. B. Liang, Y. Ai, Y. Wang, C. Liu, S. Ouyang and M. Liu, Spinel-type  
966  $(\text{FeCoCrMnZn})_3\text{O}_4$  high-entropy oxide: Facile preparation and supercapacitor  
967 performance, *Materials*, 2020, **13**, 5798.
- 968 25. B. Talluri, M. L. Aparna, N. Sreenivasulu, S. S. Bhattacharya and T. Thomas,  
969 High entropy spinel metal oxide  $(\text{CoCrFeMnNi})_3\text{O}_4$  nanoparticles as a high-  
970 performance supercapacitor electrode material, *Journal of Energy Storage*,  
971 2021, **42**, 103004.
- 972
